# Supplementary material
Source: PubMed Central journal article supplement (PMC196874)
Supplement: pnas_100_19_10746__2.pdf [file pnas_100_19_10746__2.pdf]

HsPso4 : -----\*-----20-----\*-----40-----\*-----60-----\*-----80-----\*-----100 : 75  
MmPso4 : -----\*-----20-----\*-----40-----\*-----60-----\*-----80-----\*-----100 : 75  
RnPso4 : -----\*-----20-----\*-----40-----\*-----60-----\*-----80-----\*-----100 : 75  
DmPso4 : -----\*-----20-----\*-----40-----\*-----60-----\*-----80-----\*-----100 : 75  
CePso4 : MSHVNQAVSCIFCYFQEMSFVCGISGELTDPVVSQVSGHIFDRRLIVKFAIENGTDPI SHGELSEDQLVSLKSGGTG-----SAPRNVSGTSIPSL : 93  
ScPso4 : -----\*-----20-----\*-----40-----\*-----60-----\*-----80-----\*-----100 : 81

HsPso4 : KALQDEWDAVMLHSFTLRQQLQTRQELSHALYQHDAACRVIA RLTKVTAAREALATLKPQAGLIV-PQAVPSSQPSVVGAGEPMDLGELVGTPEIIQ : 174  
MmPso4 : KALQDEWDAVMLHSFTLRQQLQTRQELSHALYQHDAACRVIA RLTKVTAAREALATLKPQAGLIV-PQAVPSSQPSVVGAGEPMDLGELVGTPEIIQ : 174  
RnPso4 : KALQDEWDAVMLHSFTLRQQLQTRQELSHALYQHDAACRVIA RLTKVTAAREALATLKPQAGLIV-PQAVPSSQPSVVGAGEPMDLGELVGTPEIIQ : 174  
DmPso4 : KTMQDEWDALMIHSFTLRQQLQTRQELSHALYQHDAACRVIA RLTKVTAAREALATLKPQAGIANAPTAIPQALASEAGGAAAHPEQAGVSAEVIQ : 175  
CePso4 : KMLQDEWDIVMLNSFSLRQQLQTRQELSHALYQHDAACRVIA RLTKVTAAREALATLKPQAGLIV--D-----DDVSI DESEDQQLSEAI : 179  
ScPso4 : TSLQNEWDAIMLENFKLRSTLDSLTKKLSTVMYRDAKLVAAQLLMEKNEDSKDLPKSSQQA VAIT--REEFL-QG---LLQSSRDFVARGKIKAPKWP : 175

HsPso4 : KIQDKATVLTTERKKRGLVPEELVKPEELSKYRQVASHVGLHSASIPGILALDLCPSDTNKILTGADKNVVVFDKSTEQIILATLKCHTKKVTSVVFHP : 274  
MmPso4 : KIQDKATVLTTERKKRGLVPEELVKPEELSKYRQVASHVGLHSASIPGILALDLCPSDTNKILTGADKNVVVFDKSTEQIILATLKCHTKKVTSVVFHP : 274  
RnPso4 : KIQDKATVLTTERKKRGLVPEELVKPEELSKYRQVASHVGLHSASIPGILALDLCPSDTNKILTGADKNVVVFDKSSSEQIILATLKCHTKKVTSVVFHP : 274  
DmPso4 : KIQDKATVLTQERKKRGLVPEELVTTDQVKNFLTVA SHPGLHSASVPGILALDINSADHSKILTGNDKNATVFNKDTQMVAILKCHTKKTKVIYHP : 275  
CePso4 : LAKLEEKSKSLTAEKQRGKNLPEGLAKTEELAEKQIASHTGIHSTGTPGITALDIKG-NLS--LTGGIDKTVWLYDYEKEQVMQTFKGHNKINAVVL : 276  
ScPso4 : IILKLELELQAQNYSENKIFPYKELNKSMMYDKVWCMCRCEDGALHFTQIKDKSKTITITTPNPTGGEHPATISRGPCNRLLLYPNQITLDSKTNK : 275

HsPso4 : SQELVFSASPDATIRIWSVPNTSCVQVRAHESAVTGLSLHATGDYLLSSDDQYWAFSDIQTCRVLTKVTDETSGCS-LTCAQFHPDGLIFGTGTMDSQ : 373  
MmPso4 : SQELVFSASPDATIRIWSVPNTSCVQVRAHESAVTGLSLHATGDYLLSSDDQYWAFSDIQTCRVLTKVTDETSGCS-LTCAQFHPDGLIFGTGTMDSH : 373  
RnPso4 : SQDLVFSASPDATIRIWSVPNASCVQVRAHESAVTGLSLHATGDYLLSSDDQYWAFSDIQTCRVLTKVTDETSGCS-LTCAQFHPDGLIFGTGTMDSQ : 373  
DmPso4 : NEDTVITGSPDMNIRIWHVPTSQTQLLRCHCEGPVTGLSLHPTGDYLLSTSSDKHWAFSDIRTCRLLTKVIDTAEVG--LTTAQFHPDGLIFGTGTVDSQ : 373  
CePso4 : HPDNITAIASADSHIRVWSATDSSKAIIDVHQAPVTDLSLNASGDYIISASDDSYWAFSDIRSGKSLCKVSVPEGSOIAVHSIEFHPDGLIFGTGAAD : 376  
ScPso4 : VLREIEVDANEIIMYGHNEVNTFYFWADNRGTICFQSYEDDSQYVHSAKSDVEYSGVLHKKDSLALALYSPDGI-LDVYNLSSPD-----QASSRF : 369

HsPso4 : IKIWLKERITNVANFPCHSGPITSIAFSENGYYLATAADDSSVKLWDLRKLKNFKTLQLDNNFEVKS LIFDQSC TYLALGGTDVQIYI CKQWTEILHFTE : 473  
MmPso4 : IKIWLKERITNVANFPCHSGPITSIAFSENGYYLATAADDSSVKLWDLRKLKNFKTLQLDNNFEVKS LIFDQSC TYLALGGTDVQIYI CKQWTEILHFTE : 473  
RnPso4 : IKIWLKERITNVANFPCHSGPITSIAFSENGYYLATAADDSSVKLWDLRKLKNFKTLQLDNNFEVKS LIFDQSC TYLALGGTDVQIYI CKQWTEILHFTE : 473  
DmPso4 : VKIWLKESQNVANFPCHTGPISAI SFSENGYYLATAADDACVKLWDLRKLKNFKTIQLDDGYEVKDLCFDQSC TYLALAGSDVRYLCKQWQELKVFND : 473  
CePso4 : AVKILWDLINQTVAAAFPGHTAAVRSIAFSENGYYLATGSEDEGIVKWLWDLRKLKNKFTANEKQPINSLSFDMTGTFLGIGGQKVVQLHVKSWEVVSLL : 476  
ScPso4 : PVDEEAKIKVEKVFADNCGYWMVVECDQTVVCFDLRDKDVGTLAYPYTYIPEFKTGTVTYDIDDSGKNMIAYSNESNSLTIYKFKDKTKNWKDEESALCLQS : 469

HsPso4 : HSGLITGVAFGHHAQFIASSTGMDRSLKFFYSL----- : 504  
MmPso4 : HSGLITGVAFGHHAQFIASSTGMDRSLKFFYSL----- : 504  
RnPso4 : HSGLITGVAFGHHAQFIASSTGMDRSLKFFYSL----- : 504  
DmPso4 : HTALATGVRFKHAQYLASTSMDRSLKLYAIE----- : 505  
CePso4 : SDHSGPVTGVRFGENARSLVTCSLDKSLRVFSF---- : 509  
ScPso4 : DTADFIDVDVCGDGGIAAILKTNDSFNIVALTP--- : 503
